# Supplementary material
Source: HighWire-hosted journal article supplement (doi:10.1101/rna.079923.123)
Supplement: Supplemental_Table_1.xlsx [file Supplemental_Table_1.xlsx]

## Sheet: Supplementary_table1
RNA name	sequence(5'->3')	Forward oligo (5' -> 3')	Reverse oligo (5' -> 3')	note
Thermococcus_kodakarensis_KOD1_tRNA-His-GTG	GCCGGGGUGGUGUAGCCUGGUUAGCACAGGGGACUGUGGAUCCCCUAGCCCGGGUUCAAAUCCCGGCCCCGGCCCCA	CCTCGAGTAATACGACTCACTCACTATAGCCGGGGTGGTGTAGCCTGGTTAGCACAGG	TGGGGCCGGGGCCGGGATTTGAACCCGGGCTAGGGGATCCACAGTCCCCTGTGCTAACCAGGCTACACC	Unpublished
Thermoplasma_HO-62_acidophilum_tRNA-Leu-TAG	GCGGAGGUUGUCGAGACUGGCCAAAGGCGAUGGAUUUAGGGUCCAUUCCCGAAGGGGUUCGAGGGUUCAAAUCCCUCCCUCCGCACCA	GCGAAATTAATACGACTCACTATAGCGGAGGTTGTCGAGACTGGCCAAAGGCGATGGATTTAGGGTC	TGGTGCGGAGGGAGGGATTTGAACCCTCGAACCCCTTCGGGAATGGACCCTAAATCCATCGCCTTTGGC	Published
Thermus_thermophilus_HB8_tRNA-Pro-CGG	GGGGGAGTAGCGCAGCCCGGTAGCGCACCTCGTTCGGGACGAGGGGGTCGCTGGTTCAAATCCAGTCTCCCCCACCA	GCCTAATACGACTCACTATAGGGGGAGTAGCGCAGCCCGGTAGCGCACCTCGTTCGGGA	TGGTGGGGGAGACTGGATTTGAACCAGCGACCCCCTCGTCCCGAACGAGGTGCGCTACC	Published
Thermococcus_kodakarensis_KOD1_tRNA-His-GTG	GCCGGGGUGGUGUAGCCUGGUUAGCACAGGGGACUGUGGAUCCCCUAGCCCGGGUUCAAAUCCCGGCCCCGGCCCCA	GCCTAATACGACTCACTATAGCCGGGGTGGTGTAGCCTGGTTAGCACAGGGGACTGTGGATCCCCTAGCCCGGGTTCAAATCCCGGCCCCGGC	TGGGGCCGGGGCCGGGATTTGAACCCGGGC	Suboptimal
Thermoplasma_HO-62_acidophilum_tRNA-Leu-TAG	GCGGAGGUUGUCGAGACUGGCCAAAGGCGAUGGAUUUAGGGUCCAUUCCCGAAGGGGUUCGAGGGUUCAAAUCCCUCCCUCCGCACCA	GCCTAATACGACTCACTATAGCGGAGGTTGTCGAGACTGGCCAAAGGC	TGGTGCGGAGGGAGGGATTTGAACCCTCGAACCCCTTCGGGAATGGACCCTAAATCCATCGCCTTTGGCCAGTCTCGACAACCTCCGC	Suboptimal
Thermus_thermophilus_HB8_tRNA-Pro-CGG	GGGGGAGTAGCGCAGCCCGGTAGCGCACCTCGTTCGGGACGAGGGGGTCGCTGGTTCAAATCCAGTCTCCCCCACCA	GCCTAATACGACTCACTATAGGGGGAGTAGCGCAGCCCGGTAGCGCACCTCGTTCGGGACGAGGGGGTCGCTGGTTCAAATCCAGTCTCCCC	TGGTGGGGGAGACTGGATTTGAACCAGCGACCCCC	Suboptimal
Thermococcus_kodakarensis_KOD1_tRNA-His-GTG	GCCGGGGUGGUGUAGCCUGGUUAGCACAGGGGACUGUGGAUCCCCUAGCCCGGGUUCAAAUCCCGGCCCCGGCCCCA	GCCTAATACGACTCACTATAGCCGGGGTGGTGTAGCCTGGTTAGCA	TGGGGCCGGGGCCGGGATTTGAACCCGGGCTAGGGGATCCACAGTCCCCTGTGCTAACCAGGCTACACCACCCCGGCTATAGTGAG	Primerize
Thermoplasma_HO-62_acidophilum_tRNA-Leu-TAG	GCGGAGGUUGUCGAGACUGGCCAAAGGCGAUGGAUUUAGGGUCCAUUCCCGAAGGGGUUCGAGGGUUCAAAUCCCUCCCUCCGCACCA	GCCTAATACGACTCACTATAGCGGAGGTTGTCGAGACTGGCCAAAGGCGATGGATTTA	TGGTGCGGAGGGAGGGATTTGAACCCTCGAACCCCTTCGGGAATGGACCCTAAATCCATCGCCTTTGGCCAGTCT	Primerize
Thermus_thermophilus_HB8_tRNA-Pro-CGG	GGGGGAGTAGCGCAGCCCGGTAGCGCACCTCGTTCGGGACGAGGGGGTCGCTGGTTCAAATCCAGTCTCCCCCACCA	GCCTAATACGACTCACTATAGGGGGAGTAGCGCAGCCCGGTAGCGCACCTCGTTCGGGACGAGGGGGTCGCTGGTTCAA	TGGTGGGGGAGACTGGATTTGAACCAGCGACCCCCTCGTCCCGAA	Primerize
Thermoplasma_HO-62_acidophilum_tRNA-Leu-TAG	GCGGAGGUUGUCGAGACUGGCCAAAGGCGAUGGAUUUAGGGUCCAUUCCCGAAGGGGUUCGAGGGUUCAAAUCCCUCCCUCCGCACCA	GCCTAATACGACTCACTATAGCGGAGGTTGTCGAGACTGGCCAAAGGCGATGGATTTAGGGTCCATTCCCGAAGGGGTTCGAGGGTTC	TGGTGCGGAGGGAGGGATTTGAACCCTCGAACCCCTTCGGGAATGGACC	ROCKET
Thermus_thermophilus_HB8_tRNA-Pro-CGG	GGGGGAGTAGCGCAGCCCGGTAGCGCACCTCGTTCGGGACGAGGGGGTCGCTGGTTCAAATCCAGTCTCCCCCACCA	GCCTAATACGACTCACTATAGGGGGAGTAGCGCAGCCCGGTAGCGCACC	TGGTGGGGGAGACTGGATTTGAACCAGCGACCCCCTCGTCCCGAACGAGGTGCGCTACCGGGCTGCGCTACTCC	ROCKET
Thermococcus_kodakarensis_KOD1_tRNA-Ala-CGC	GGGCCGGUAGCUCAGCCUGGUAUGAGCGCCGCCCUCGCAAGGCGGAGGCCGCGGGUUCAAAUCCCGCCCGGUCCACCA	GCCTAATACGACTCACTATAGGGCCGGTAGCTCAGCCTGGTATGAGCGC	TGGTGGACCGGGCGGGATTTGAACCCGCGGCCTCCGCCTTGCGAGGGCGGCGCTCATACCAGGCTGAGCTACCGGC	ROCKET
Thermococcus_kodakarensis_KOD1_tRNA-Ala-GGC	GGGCCGGUAGCUCAGCCUGGUAUGAGCGCCGCCUUGGCAAGGCGGAGGCCCCGGGUUCAAAUCCCGGCCGGUCCACCA	GCCTAATACGACTCACTATAGGGCCGGTAGCTCAGCCTGGTATGAGCGC	TGGTGGACCGGCCGGGATTTGAACCCGGGGCCTCCGCCTTGCCAAGGCGGCGCTCATACCAGGCTGAGCTACCGGC	ROCKET
Thermococcus_kodakarensis_KOD1_tRNA-Ala-TGC	GGGCCGGUAGCUCAGCCUGGGAGAGCGUCGGCUUUGCAAGCCGAAGGCCCCGGGUUCGAAUCCCGGCCGGUCCACCA	GCCTAATACGACTCACTATAGGGCCGGTAGCTCAGCCTGGGAGAGCGTCG	TGGTGGACCGGCCGGGATTCGAACCCGGGGCCTTCGGCTTGCAAAGCCGACGCTCTCCCAGGCTGAGCTACCG	ROCKET
Thermococcus_kodakarensis_KOD1_tRNA-Arg-CCG	GGGCCGGUGGCCUAGUCUGGACGGGGCGUCGGCCUCCGGAGCCGAAGGUCGCGGGUUCGAAUCCCGCCCGGCCCGCCA	GCCTAATACGACTCACTATAGGGCCGGTGGCCTAGTCTGGACGGGGCGTCGGCCTCCGGAGCCGAAGGTCGCGGGTTCGAATCCCGCC	TGGCGGGCCGGGCGGGATTCGAACCCGCGACCTTCGG	ROCKET
Thermococcus_kodakarensis_KOD1_tRNA-Arg-CCT	GGACCGGUAGCCUAGCCAGGAUAGGGCGGCGGCCUCCUAAGCCGCAGGUCCGGGGUUCGAAGCCCCGCCGGUCCGCCA	GCCTAATACGACTCACTATAGGACCGGTAGCCTAGCCAGGATAGGGCGGCGGCC	TGGCGGACCGGCGGGGCTTCGAACCCCGGACCTGCGGCTTAGGAGGCCGCCGCCCTATCCTGGCTAGGC	ROCKET
Thermococcus_kodakarensis_KOD1_tRNA-Arg-GCG	GCCCCGGUGGCCUAGUCUGGAUAGGGCGCGAGGCUGCGGACCUCGAGGUCCGGGGUUCAAAUCCCCGCCGGGGCGCCA	GCCTAATACGACTCACTATAGCCCCGGTGGCCTAGTCTGGATAGGGCGCGAGGCTGCGGACCTCGAGGTCCGG	TGGCGCCCCGGCGGGGATTTGAACCCCGGACCTCGAGGTCCGCAGCCTCG	ROCKET
Thermococcus_kodakarensis_KOD1_tRNA-Arg-TCG	GGGCCGGUGGCCUAGUCUGGACGGGGCGUCGGCCUUCGGAGCCGAAGGUCCCGGGUUCAAAUCCCGGCCGGCCCGCCA	GCCTAATACGACTCACTATAGGGCCGGTGGCCTAGTCTGGACGGGGCGTCGGCCTTCGGAGCCGAAGGTCCCGGGTTCAAATCCCG	TGGCGGGCCGGCCGGGATTTGAACCCGGGACCTTCGGCTC	ROCKET
Thermococcus_kodakarensis_KOD1_tRNA-Arg-TCT	GGGCCCGUAGCCUAGCAGGAUAGGGCGCCGGCCUUCUAAGCCGGAGGUCGCGGGUUCGAAUCCCGCCGGGCCCGCCA	GCCTAATACGACTCACTATAGGGCCCGTAGCCTAGCAGGATAGGGCGCCGGCCTTCTAAGCCGGAGGTCGCGGGTTC	TGGCGGGCCCGGCGGGATTCGAACCCGCGACCTCCGGCTTAGAAGGC	ROCKET
Thermococcus_kodakarensis_KOD1_tRNA-Asn-GTT	GCCGCCGUAGCUUAGUUGGUAGAGCGCCGGACUGUUAAUCCGGCGGUCCCCGGUUCGAAUCCGGGCGGCGGCGCCA	GCCTAATACGACTCACTATAGCCGCCGTAGCTTAGTTGGTAGAGCGCCGGACTG	TGGCGCCGCCGCCCGGATTCGAACCGGGGACCGCCGGATTAACAGTCCGGCGCTCTACCAACTAAGCTACG	ROCKET
Thermococcus_kodakarensis_KOD1_tRNA-Asp-GTC	GCCCGGGUGGUGUAGCCCGGCCCAUCAUACGGGACUGUCACUCCCGUGACCCGGGUUCAAAUCCCGGCCCGGGCGCCA	GCCTAATACGACTCACTATAGCCCGGGTGGTGTAGCCCGGCCCATCATACGGGACTGTCACTCCCGTGACCCGGGTTCAAATCCCGGCCC	TGGCGCCCGGGCCGGGATTTGAACCCGGGTCACGG	ROCKET
Thermococcus_kodakarensis_KOD1_tRNA-Cys-GCA	GCCGGGAUAGCCUAGAGGCGAGGCGAGGGACUGCAGAUCCCUUUCACCCGGGUUCAAAUCCCGGUCCCGGCUCCA	GCCTAATACGACTCACTATAGCCGGGATAGCCTAGAGGCGAGGCGAGGGACTGCAGATCCCTTTCACCCGGGTTCAAATCCCGGTCC	TGGAGCCGGGACCGGGATTTGAACCCGGGTGAAAGGG	ROCKET
Thermococcus_kodakarensis_KOD1_tRNA-Gln-CTG*	GGCCCCGUGGUGUAGCGGCCAAGCAUGCGGGACUCUGGAUCCCGCGACCGGGGUUCGAAUCCCCGCGGGGCCACCA	GCCTAATACGACTCACTATAGGCCCCGTGGTGTAGCGGCCAAGCATGCG	TGGTGGCCCCGCCGGGATTCGAACCCGGGTCGCGGGATCCAAAGTCCCGCATGCTACGCCGCTACACCACGGG	ROCKET
Thermococcus_kodakarensis_KOD1_pre-tRNA-Gln-CTG	GGGAGACCACAACGGUUUCCCUCUAGAAGCCCCGUGGUGUAGCGGCCAAGCAUGCGGGACUCUGGAUCCCGCGACCGGGGUUCGAAUCCCCGCGGGGCUACCA	GCCTAATACGACTCACTATAGGGAGACCACAACGGTTTCCCTCTAGAAGCCCCGTGGTGTAGCGGCCAAGCATGCGGGACTCTGGATCCCGCGACCGG	TGGTAGCCCCGCGGGGATTCGAACCCCGGTCGCGGGATCCAGAGTCCCGC	ROCKET
Thermococcus_kodakarensis_KOD1_tRNA-Gln-TTG*	GGCCCCGUGGUGUAGCGGCCAAGCAUGCGGGACUUUGGAUCCCGCGACCCGGGUUCGAAUCCCGGCGGGGCCACCA	GCCTAATACGACTCACTATAGGCCCCGTGGTGTAGCGGCCAAGCATGCG	TGGTGGCCCCGCCGGGATTCGAACCCGGGTCGCGGGATCCAAAGTCCCGCATGCTTGGCCGCTACACCACGGG	ROCKET
Thermococcus_kodakarensis_KOD1_pre-tRNA-Gln-TTG	GGGAGACCACAACGGUUUCCCUCUAGAAGCCCCGUGGUGUAGCGGCCAAGCAUGCGGGACUUUGGAUCCCGCGACCCGGGUUCGAAUCCCGGCGGGGCUACCA	GCCTAATACGACTCACTATAGGGAGACCACAACGGTTTCCCTCTAGAAGCCCCGTGGTGTAGCGGCCAAGCATGCGGGAC	TGGTAGCCCCGCCGGGATTCGAACCCGGGTCGCGGGATCCAAAGTCCCGCATGCTTGGCCGCTACACCACG	ROCKET
Thermococcus_kodakarensis_KOD1_tRNA-Glu-CTC	GCCCCGGUGGUGUAGCCCGGUCAAUCAUGCGGGACUCUCGAUCCCGCGACCCGGGUUCAAAUCCCGGCCGGGGCACCA	GCCTAATACGACTCACTATAGCCCCGGTGGTGTAGCCCGGTCAATCATGCGGGACTCTCGATCCCG	TGGTGCCCCGGCCGGGATTTGAACCCGGGTCGCGGGATCGAGAGTCCCGCATGATTGACCG	ROCKET
Thermococcus_kodakarensis_KOD1_tRNA-Glu-TTC	GCCCCGGUGGUGUAGCCCGGUCAAACAUGCGGGCCUUUCGAGCCCGCGCCCCGGGUUCAAAUCCCGGCCGGGGCACCA	GCCTAATACGACTCACTATAGCCCCGGTGGTGTAGCCCGGTCAAACATGCGGGCCTTTCGAGCC	TGGTGCCCCGGCCGGGATTTGAACCCGGGGCGCGGGCTCGAAAGGCCCGCATGTTTGACCGG	ROCKET
Thermococcus_kodakarensis_KOD1_tRNA-Gly-CCC	GCGGUGGUAGUCUAGCCUGGUCUAGGACACCGGCCUCCCAAGCCGGUAACCCGGGUUCAAAUCCCGGCCACCGCACCA	GCCTAATACGACTCACTATAGCGGTGGTAGTCTAGCCTGGTCTAGGACACCGGCCTCC	TGGTGCGGTGGCCGGGATTTGAACCCGGGTTACCGGCTTGGGAGGCCGGTGTCCTAGACCAGGCTAG	ROCKET
Thermococcus_kodakarensis_KOD1_tRNA-Gly-GCC	GCGGUGGUAGUCUAGCCUGGCUAGGACAGCGGCCUGCCACGCCGCUGGCCCGGGUUCAAAUCCCGGCCACCGCACCA	GCCTAATACGACTCACTATAGCGGTGGTAGTCTAGCCTGGCTAGGACAGCGGCCTGCCACGCCG	TGGTGCGGTGGCCGGGATTTGAACCCGGGCCAGCGGCGTGGCAGGCCGCTGTCCTAG	ROCKET
Thermococcus_kodakarensis_KOD1_tRNA-Gly-TCC	GCGGUGGUAGUCUAGCCUGGUCUAGGACACCGGCCUUCCAAGCCGGUGACCCGGGUUCAAAUCCCGGCCACCGCACCA	GCCTAATACGACTCACTATAGCGGTGGTAGTCTAGCCTGGTCTAGGACACC	TGGTGCGGTGGCCGGGATTTGAACCCGGGTCACCGGCTTGGAAGGCCGGTGTCCTAGACCAGGCTAGACTACCACCG	ROCKET
Thermococcus_kodakarensis_KOD1_tRNA-His-GTG(plus G-1)	GGCCGGGGUGGUGUAGCCUGGUUAGCACAGGGGACUGUGGAUCCCCUAGCCCGGGUUCAAAUCCCGGCCCCGGCCCCA	GCCTAATACGACTCACTATAGGCCGGGGTGGTGTAGCCTGGTTAGCACAGGGGACTGTGGATCCCCTAGCCCGGGTTCAAATCCC	TGGGGCCGGGGCCGGGATTTGAACCCGGGCTAGGGGATCCAC	ROCKET
Thermococcus_kodakarensis_KOD1_tRNA-His-GTG	GCCGGGGUGGUGUAGCCUGGUUAGCACAGGGGACUGUGGAUCCCCUAGCCCGGGUUCAAAUCCCGGCCCCGGCCCCA	GCCTAATACGACTCACTATAGCCGGGGTGGTGTAGCCTGGTTAGCACAGGGGACTGTGGATCCCCTAGCCCGGGTTCAAATCCC	TGGGGCCGGGGCCGGGATTTGAACCCGGGCTAGGGGATCCAC	ROCKET
Thermococcus_kodakarensis_KOD1_tRNA-Ile-GAT	GGGCCCGUGGCUCAGCCUGGUCAGAGCGCCCGCCUGAUAAGCGGGAGGUCCGGGGUUCGAAGCCCCGCGGGCCCACCA	GCCTAATACGACTCACTATAGGGCCCGTGGCTCAGCCTGGTCAGAGCGC	TGGTGGGCCCGCGGGGCTTCGAACCCCGGACCTCCCGCTTATCAGGCGGGCGCTCTGACCAGGCTGAGCCACGG	ROCKET
Thermococcus_kodakarensis_KOD1_tRNA-Ile2-CAT	GGGCCCGUAGCUCAGCCUGGUCAGAGCGCGCGGCUCAUAACCGCGUGGUCGGGGGUUCAAAGCCCCCCGGGCCCACCA	GCCTAATACGACTCACTATAGGGCCCGTAGCTCAGCCTGGTCAGAGCG	TGGTGGGCCCGGGGGGCTTTGAACCCCCGACCACGCGGTTATGAGCCGCGCGCTCTGACCAGGCTGAGCTACGGGC	ROCKET
Thermococcus_kodakarensis_KOD1_tRNA-Leu-CAA	GCGGGGGUUGCCGAGCCUGGUCAAAGGCGGUGGACUCAAGAUCCACUCCCGCAGGGGUUCCGGGGUUCAAAUCCCCGCCCCCGCACCA	GCCTAATACGACTCACTATAGCGGGGGTTGCCGAGCCTGGTCAAAGG	TGGTGCGGGGGCGGGGATTTGAACCCCGGAACCCCTGCGGGAGTGGATCTTGAGTCCACCGCCTTTGACCAGGCTCGGCAACCCCCG	ROCKET
Thermococcus_kodakarensis_KOD1_tRNA-Leu-CAG	GCGGGGGUAGCCGAGCCUGGCCAAAGGCGCGGGAUUCAGGGUCCCGUCCCGCAGGGGUUCCGGGGUUCAAAUCCCCGCCCCCGCACCA	GCCTAATACGACTCACTATAGCGGGGGTAGCCGAGCCTGGCCAAAGG	TGGTGCGGGGGCGGGGATTTGAACCCCGGAACCCCTGCGGGACGGGACCCTGAATCCCGCGCCTTTGGCCAGGCTCGGCTACCCCC	ROCKET
Thermococcus_kodakarensis_KOD1_tRNA-Leu-GAG	GCGGGGGUUGCCGAGCCUGGUCAAAGGCGCGGGAUUGAGGGUCCCGUCCCGCAGGGGUUCCGGGGUUCAAAUCCCCGCCCCCGCACCA	GCCTAATACGACTCACTATAGCGGGGGTTGCCGAGCCTGGTCAAAGG	TGGTGCGGGGGCGGGGATTTGAACCCCGGAACCCCTGCGGGACGGGACCCTCAATCCCGCGCCTTTGACCAGGCTCGGCAACCCCCG	ROCKET
Thermococcus_kodakarensis_KOD1_tRNA-Leu	GCGGGGGUGCCCGAGCCUGGCCAAAGGGGGCGGACUUAAGAUCCGCUGCCGUAGGGCUGCGCGGGUUCGAAUCCCGUCCCCCGCACCA	GCCTAATACGACTCACTATAGCGGGGGTGCCCGAGCCTGGCCAAAGGGGGCGGACTTAAGATCCGCTGCCGTAGGGCTGC	TGGTGCGGGGGACGGGATTCGAACCCGCGCAGCCCTACGGCAGCGGATCTTAAGTCC	ROCKET
Thermococcus_kodakarensis_KOD1_tRNA-Leu-TAG	GCGGGGGUAGCCGAGCCUGGCCAAAGGCGCGGGAUUUAGGGUCCCGUCCCGCAGGGGUUCCGGGGUUCAAAUCCCCGCCCCCGCACCA	GCCTAATACGACTCACTATAGCGGGGGTAGCCGAGCCTGGCCAAAGG	TGGTGCGGGGGCGGGGATTTGAACCCCGGAACCCCTGCGGGACGGGACCCTAAATCCCGCGCCTTTGGCCAGGCTCGGCTACCCCC	ROCKET
Thermococcus_kodakarensis_KOD1_tRNA-Lys-CTT	GGGCCGGUAGCUUAGCCUGGUUAGAGCGGCGGACUCUUAAUCCGCAGGUCGGGGGUUCGAAUCCCCCCCGGCCCGCCA	GCCTAATACGACTCACTATAGGGCCGGTAGCTTAGCCTGGTTAGAGCGG	TGGCGGGCCGGGGGGGATTCGAACCCCCGACCTGCGGATTAAGAGTCCGCCGCTCTAACCAGGCTAAGCTACCGGCC	ROCKET
Thermococcus_kodakarensis_KOD1_tRNA-Lys-TTT	GGGCCGGUAGCUCAGCCUGGUUAGAGCGCGGGGCUUUUAACCCCGUGGCCGCGGGUUCGAAUCCCGCCCGGCCCGCCA	GCCTAATACGACTCACTATAGGGCCGGTAGCTCAGCCTGGTTAGAGCGCG	TGGCGGGCCGGGCGGGATTCGAACCCGCGGCCACGGGGTTAAAAGCCCCGCGCTCTAACCAGGCTGAGCTACCGG	ROCKET
Thermococcus_kodakarensis_KOD1_tRNA-Met-CAT	GCCGGGGUAGCUUAGCCUGGUCAGAGCGCUCGGCUCAUAACCGAGAGGUCCGGGGUUCAAAGCCCCGCCCCGGCACCA	GCCTAATACGACTCACTATAGCCGGGGTAGCTTAGCCTGGTCAGAGCGCTCGGCTCATAACCGAGAGGTCCGGGG	TGGTGCCGGGGCGGGGCTTTGAACCCCGGACCTCTCGGTTATGAGCCGAG	ROCKET
Thermococcus_kodakarensis_KOD1_tRNA-Phe-GAA	GGGGCGGUAGCUCAGCCUGGGAGAGCGCCGGACUGAAGAUCCGGGUGUCGGGGGUUCAAAUCCCCCUCGCCCCACCA	GCCTAATACGACTCACTATAGGGGCGGTAGCTCAGCCTGGGAGAGCGCCGGACTGAAGATCCGGGTGTCGGGG	TGGTGGGGCGAGGGGGATTTGAACCCCCGACACCCGGATCTTCAGTCCGGC	ROCKET
Thermococcus_kodakarensis_KOD1_tRNA-Pro-CGG	GGGGCCGUGGGGUAGCUUGGUCUAUCCUUCCGGCUUCGGGAGCCGGAGACCCGAGUUCAAAUCUCGGCGGCCCCACCA	GCCTAATACGACTCACTATAGGGGCCGTGGGGTAGCTTGGTCTATCCTTCCGGCTTCGGGAGC	TGGTGGGGCCGCCGAGATTTGAACTCGGGTCTCCGGCTCCCGAAGCCGGAAGGATAGACCAAG	ROCKET
Thermococcus_kodakarensis_KOD1_tRNA-Pro-GGG	GGGGCCGUGGGGUAGCUUGGUCUAUCCUCCCGGCUUGGGGUGCCGGAGACCCGGGUUCAAAUCCCGGCGGCCCCACCA	GCCTAATACGACTCACTATAGGGGCCGTGGGGTAGCTTGGTCTATCCTCCCGGCTTGGGGTGCCGGAGACCCGGGTTCAAATCCCGG	TGGTGGGGCCGCCGGGATTTGAACCCGGGTCTCCGGCAC	ROCKET
Thermococcus_kodakarensis_KOD1_tRNA-Pro-TGG	GGGGCCGUGGGGUAGCUUGGUCUAUCCUGCGGGCUUUGGGAGCCCGUGACCCGGGUUCAAAUCCCGGCGGCCCCACCA	GCCTAATACGACTCACTATAGGGGCCGTGGGGTAGCTTGGTCTATCCTGCGGGCTTTGGGAGCCCGTGACCCGGGTTCAAATC	TGGTGGGGCCGCCGGGATTTGAACCCGGGTCACGGGCTCCCAAAG	ROCKET
Thermococcus_kodakarensis_KOD1_tRNA-Ser-CGA	GCCGGGGUAGCCUAGCCUGGGAAGGCGCGGGACUCGAGAUCCCGUGGGCGUCCGCCCACCAGGGUUCAAAUCCCUGCCCCGGCGCCA	GCCTAATACGACTCACTATAGCCGGGGTAGCCTAGCCTGGGAAGGCGCGGGACTCGAGATCCCGTGGGCGTCCGCCCACCAGGGTTCAAATCCCTG	TGGCGCCGGGGCAGGGATTTGAACCCTGGTGGGCGGACG	ROCKET
Thermococcus_kodakarensis_KOD1_tRNA-Ser-GCT	GCCGCGGUAGCCUAGCCUGGUAGGGCGCCGGCCUGCUAAGCCGGUGGGCGGUGCCCACCGGGGUUCAAAUCCCCGCCGCGGCGCCA	GCCTAATACGACTCACTATAGCCGCGGTAGCCTAGCCTGGTAGGGCGCCGGCCTGCTAAGCCGGTGGGCGGTG	TGGCGCCGCGGCGGGGATTTGAACCCCGGTGGGCACCGCCCACCGGCTTAGCAGGCCG	ROCKET
Thermococcus_kodakarensis_KOD1_tRNA-Ser-GGA	GCCGGGGUAGCCUAGCCUGGGAAGGCGCGGGCCUGGAGAGUCCGUGGGCGUUUGCCCGCCAGGGUUCAAAUCCCUGCCCCGGCGCCA	GCCTAATACGACTCACTATAGCCGGGGTAGCCTAGCCTGGGAAGGCGCGGGCCTGGAGAGTCCGTGGGCGTTTG	TGGCGCCGGGGCAGGGATTTGAACCCTGGCGGGCAAACGCCCACGGACTCTCCAGGCCCG	ROCKET
Thermococcus_kodakarensis_KOD1_tRNA-Ser-TGA	GCCGGGAUCGCCUAGCCUGGGAUGGCGCGGGCCUUGAGAGCCCGUGGCCGUAUGGCCACCGGGGUUCAAAUCCCCGUCCCGGCGCCA	GCCTAATACGACTCACTATAGCCGGGATCGCCTAGCCTGGGATGGCGCGGGCCTTGAGAGCCCGTGGCCGTATGGCCACCGGGGTTCAAATCC	TGGCGCCGGGACGGGGATTTGAACCCCGGTGGCCATACGGCCAC	ROCKET
Thermococcus_kodakarensis_KOD1_tRNA-Thr-CGT	GCCGGGGUAGCCUAGCUCGGCAGGGCGGCGGACUCGUAAUCCGCAGGUCCCGGGUUCAAAUCCCGGUCCCGGCUCCA	GCCTAATACGACTCACTATAGCCGGGGTAGCCTAGCTCGGCAGGGCGGCG	TGGAGCCGGGACCGGGATTTGAACCCGGGACCTGCGGATTACGAGTCCGCCGCCCTGCCGAGCTAGGCTAC	ROCKET
Thermococcus_kodakarensis_KOD1_tRNA-Thr-GGT	GCCCCGGUGGCUCAGCCUGGUGGAGCGGCCGCUUGGUAAGCGGCAGGUCGCGGGUUCAAACCCCGCCCGGGGCUCCA	GCCTAATACGACTCACTATAGCCCCGGTGGCTCAGCCTGGTGGAGCGGCCGCTTGGTAAGCGGCAGGTCGCGGGTTCAAACCCCG	TGGAGCCCCGGGCGGGGTTTGAACCCGCGACCTGCCGC	ROCKET
Thermococcus_kodakarensis_KOD1_tRNA-Thr-TGT	GCCCCGGUAGCCUAGCCUGGCGGGGCGGCGGACUUGUAAUCCGCAGGUCGCGGGUUCAAAUCCCGCCCGGGGCUCCA	GCCTAATACGACTCACTATAGCCCCGGTAGCCTAGCCTGGCGGGGCGGCGGACTTGTAATCCGCAGGTCGCGGGTTCAAATCC	TGGAGCCCCGGGCGGGATTTGAACCCGCGACCTGCGGATTACAAG	ROCKET
Thermococcus_kodakarensis_KOD1_tRNA-Trp-CCA	GGGGGCGUGGUGUAGCCUGGUCCAUCAUCGCGGGCUCCAGACCCGCGGACCGGGGUUCAAAUCCCCGCGCCCCCACCA	GCCTAATACGACTCACTATAGGGGGCGTGGTGTAGCCTGGTCCATCATCGCGGGCTCCAGACCCG	TGGTGGGGGCGCGGGGATTTGAACCCCGGTCCGCGGGTCTGGAGCCCGCGATGATGGACC	ROCKET
Thermococcus_kodakarensis_KOD1_tRNA-Tyr-GTA	CCCGCGGUAGCCUAGCCUGGGAGUGGCGGCGGACUGUAGAUCCGCAGGUCCCCGGUUCAAAUCCGGGCCGCGGGACCA	GCCTAATACGACTCACTATACCCGCGGTAGCCTAGCCTGGGAGTGGCGGCG	TGGTCCCGCGGCCCGGATTTGAACCGGGGACCTGCGGATCTACAGTCCGCCGCCACTCCCAGGCTAGGCTAC	ROCKET
Thermococcus_kodakarensis_KOD1_tRNA-Val-CAC	GGGCCCGUGGUCUAGACUGGUUAUGACGCCGCCCUCACACGGCGGAGGUCCGGGGUUCGAAUCCCCGCGGGCCCACCA	GCCTAATACGACTCACTATAGGGCCCGTGGTCTAGACTGGTTATGACGCCGC	TGGTGGGCCCGCGGGGATTCGAACCCCGGACCTCCGCCGTGTGAGGGCGGCGTCATAACCAGTCTAGACCACGGG	ROCKET
Thermococcus_kodakarensis_KOD1_tRNA-Val-GAC	GGGCCCGUGGUCUAGACUGGUUAUGACGCCACCCUGACAAGGUGGAGGUCCGGGGUUCGAAUCCCCGCGGGCCCACCA	GCCTAATACGACTCACTATAGGGCCCGTGGTCTAGACTGGTTATGACGCCACCC	TGGTGGGCCCGCGGGGATTCGAACCCCGGACCTCCACCTTGTCAGGGTGGCGTCATAACCAGTCTAGACCACGGG	ROCKET
Thermococcus_kodakarensis_KOD1_tRNA-Val-TAC	GGGCCCGUGGUCUAGAUGGUUAUGACGCCACCCUUACAAGGUGGAGGUCCGGGGUUCGAAUCCCCGCGGGCCCACCA	GCCTAATACGACTCACTATAGGGCCCGTGGTCTAGATGGTTATGACGCCACCC	TGGTGGGCCCGCGGGGATTCGAACCCCGGACCTCCACCTTGTAAGGGTGGCGTCATAACCATCTAGACCACGGG	ROCKET
Thermococcus_kodakarensis_KOD1_tRNA-iMet-CAT*	GGCGGGGUGGGGCAGCUAGGAGUGCCCGCCGGGCUCAUAACCCGGAGGUCCGAGGUUCAAAUCCUCGCCCCGCCACCA	GCCTAATACGACTCACTATAAGCGGGGTGGGGCAGCTAGGAGTGCCCGCCGGGCTCATAACCCGGAGGTCCGAGGTTCAAATC	TGGTAGCGGGGCGAGGATTTGAACCTCGGACCTCCGGGTTATGAGC	ROCKET
Thermococcus_kodakarensis_KOD1_pre-tRNA-iMet-CAT	GGGAGACCACAACGGUUUCCCUCUAGAAGCGGGGUGGGGCAGCUAGGAGUGCCCGCCGGGCUCAUAACCCGGAGGUCCGAGGUUCAAAUCCUCGCCCCGCUACCA	GCCTAATACGACTCACTATAGGGAGACCACAACGGTTTCCCTCTAGAAGCGGGGTGGGGCAGCTAGGAGTGCCCGCCGGGCTCATAACCCGG	TGGTAGCGGGGCGAGGATTTGAACCTCGGACCTCCGGGTTATGAGCCCGGCGGGCACTC	ROCKET
CPEB3 ribozyme	GGGGGCCACAGCAGAAGCGUUCACGUCGCAGCCCCUGUCAGAUUCUGGUGAAUCUGCGAAUUCUGCUG	GCCTAATACGACTCACTATAGGGGGCCACAGCAGAAGCGTTCACGTCGCAGCCCCTGTCAG	CAGCAGAATTCGCAGATTCACCAGAATCTGACAGGGGCTGCGACGTGAACGCTTC	ROCKET
Pre-CPEB3 ribozyme	GGATCAAGGGGATAACAGGGGGCCACAGCAGAAGCGUUCACGUCGCAGCCCCUGUCAGAUUCUGGUGAAUCUGCGAAUUCUGCUG	GCCTAATACGACTCACTATAGGATCAAGGGGATAACAGGGGGCCACAGCAGAAGCGTTCACGTC	CAGCAGAATTCGCAGATTCACCAGAATCTGACAGGGGCTGCGACGTGAACGCTTCTGCTGTGGCCCCC	ROCKET
EGFP	ATGGTGTCTAAAGGCGAAGAACTGTTTACTGGCGTAGTACCGATCCTGGTTGAGCTGGACGGTGATGTTAACGGCCACAAATTCTCCGTTTCTGGTGAAGGTGAAGGTGATGCAACCTATGGCAAACTGACCCTGAAATTCATCTGCACTACGGGTAAACTGCCGGTGCCGTGGCCGACTCTGGTCACCACTCTGACCTACGGTGTTCAGTGCTTCTCCCGTTATCCAGATCACATGAAGCAGCACGACTTCTTCAAATCCGCTATGCCGGAAGGCTATGTTCAAGAACGTACCATCTTCTTTAAAGACGATGGCAACTATAAAACCCGTGCAGAAGTTAAATTTGAAGGCGACACGCTGGTAAACCGTATCGAACTGAAAGGCATCGACTTCAAGGAA…	ATGGTGTCTAAAGGCGAAGAACTGTTTACTG		O1
EGFP	ATGGTGTCTAAAGGCGAAGAACTGTTTACTGGCGTAGTACCGATCCTGGTTGAGCTGGACGGTGATGTTAACGGCCACAAATTCTCCGTTTCTGGTGAAGGTGAAGGTGATGCAACCTATGGCAAACTGACCCTGAAATTCATCTGCACTACGGGTAAACTGCCGGTGCCGTGGCCGACTCTGGTCACCACTCTGACCTACGGTGTTCAGTGCTTCTCCCGTTATCCAGATCACATGAAGCAGCACGACTTCTTCAAATCCGCTATGCCGGAAGGCTATGTTCAAGAACGTACCATCTTCTTTAAAGACGATGGCAACTATAAAACCCGTGCAGAAGTTAAATTTGAAGGCGACACGCTGGTAAACCGTATCGAACTGAAAGGCATCGACTTCAAGGAA…		AACATCACCGTCCAGCTCAACCAGGATCGGTACTACGCCAGTAAACAGTTCTTCGCCTTTAGACACC	O2
EGFP	ATGGTGTCTAAAGGCGAAGAACTGTTTACTGGCGTAGTACCGATCCTGGTTGAGCTGGACGGTGATGTTAACGGCCACAAATTCTCCGTTTCTGGTGAAGGTGAAGGTGATGCAACCTATGGCAAACTGACCCTGAAATTCATCTGCACTACGGGTAAACTGCCGGTGCCGTGGCCGACTCTGGTCACCACTCTGACCTACGGTGTTCAGTGCTTCTCCCGTTATCCAGATCACATGAAGCAGCACGACTTCTTCAAATCCGCTATGCCGGAAGGCTATGTTCAAGAACGTACCATCTTCTTTAAAGACGATGGCAACTATAAAACCCGTGCAGAAGTTAAATTTGAAGGCGACACGCTGGTAAACCGTATCGAACTGAAAGGCATCGACTTCAAGGAA…	GATCCTGGTTGAGCTGGACGGTGATGTTAACGGCCACAAATTCTCCGTTTCTGGTGAAGGTGAAGG		O3
EGFP	ATGGTGTCTAAAGGCGAAGAACTGTTTACTGGCGTAGTACCGATCCTGGTTGAGCTGGACGGTGATGTTAACGGCCACAAATTCTCCGTTTCTGGTGAAGGTGAAGGTGATGCAACCTATGGCAAACTGACCCTGAAATTCATCTGCACTACGGGTAAACTGCCGGTGCCGTGGCCGACTCTGGTCACCACTCTGACCTACGGTGTTCAGTGCTTCTCCCGTTATCCAGATCACATGAAGCAGCACGACTTCTTCAAATCCGCTATGCCGGAAGGCTATGTTCAAGAACGTACCATCTTCTTTAAAGACGATGGCAACTATAAAACCCGTGCAGAAGTTAAATTTGAAGGCGACACGCTGGTAAACCGTATCGAACTGAAAGGCATCGACTTCAAGGAA…		GATGAATTTCAGGGTCAGTTTGCCATAGGTTGCATCACCTTCACCTTCACCAGAAACGGAGAATTT	O4
EGFP	ATGGTGTCTAAAGGCGAAGAACTGTTTACTGGCGTAGTACCGATCCTGGTTGAGCTGGACGGTGATGTTAACGGCCACAAATTCTCCGTTTCTGGTGAAGGTGAAGGTGATGCAACCTATGGCAAACTGACCCTGAAATTCATCTGCACTACGGGTAAACTGCCGGTGCCGTGGCCGACTCTGGTCACCACTCTGACCTACGGTGTTCAGTGCTTCTCCCGTTATCCAGATCACATGAAGCAGCACGACTTCTTCAAATCCGCTATGCCGGAAGGCTATGTTCAAGAACGTACCATCTTCTTTAAAGACGATGGCAACTATAAAACCCGTGCAGAAGTTAAATTTGAAGGCGACACGCTGGTAAACCGTATCGAACTGAAAGGCATCGACTTCAAGGAA…	AACCTATGGCAAACTGACCCTGAAATTCATCTGCACTACGGGTAAACTGCCGGTGCCGTGGCCGAC		O5
EGFP	ATGGTGTCTAAAGGCGAAGAACTGTTTACTGGCGTAGTACCGATCCTGGTTGAGCTGGACGGTGATGTTAACGGCCACAAATTCTCCGTTTCTGGTGAAGGTGAAGGTGATGCAACCTATGGCAAACTGACCCTGAAATTCATCTGCACTACGGGTAAACTGCCGGTGCCGTGGCCGACTCTGGTCACCACTCTGACCTACGGTGTTCAGTGCTTCTCCCGTTATCCAGATCACATGAAGCAGCACGACTTCTTCAAATCCGCTATGCCGGAAGGCTATGTTCAAGAACGTACCATCTTCTTTAAAGACGATGGCAACTATAAAACCCGTGCAGAAGTTAAATTTGAAGGCGACACGCTGGTAAACCGTATCGAACTGAAAGGCATCGACTTCAAGGAA…		AACGGGAGAAGCACTGAACACCGTAGGTCAGAGTGGTGACCAGAGTCGGCCACGGCACCGGCAGTT	O6
EGFP	ATGGTGTCTAAAGGCGAAGAACTGTTTACTGGCGTAGTACCGATCCTGGTTGAGCTGGACGGTGATGTTAACGGCCACAAATTCTCCGTTTCTGGTGAAGGTGAAGGTGATGCAACCTATGGCAAACTGACCCTGAAATTCATCTGCACTACGGGTAAACTGCCGGTGCCGTGGCCGACTCTGGTCACCACTCTGACCTACGGTGTTCAGTGCTTCTCCCGTTATCCAGATCACATGAAGCAGCACGACTTCTTCAAATCCGCTATGCCGGAAGGCTATGTTCAAGAACGTACCATCTTCTTTAAAGACGATGGCAACTATAAAACCCGTGCAGAAGTTAAATTTGAAGGCGACACGCTGGTAAACCGTATCGAACTGAAAGGCATCGACTTCAAGGAA…	CCTACGGTGTTCAGTGCTTCTCCCGTTATCCAGATCACATGAAGCAGCACGACTTCTTCAAATCCG		O7
EGFP	ATGGTGTCTAAAGGCGAAGAACTGTTTACTGGCGTAGTACCGATCCTGGTTGAGCTGGACGGTGATGTTAACGGCCACAAATTCTCCGTTTCTGGTGAAGGTGAAGGTGATGCAACCTATGGCAAACTGACCCTGAAATTCATCTGCACTACGGGTAAACTGCCGGTGCCGTGGCCGACTCTGGTCACCACTCTGACCTACGGTGTTCAGTGCTTCTCCCGTTATCCAGATCACATGAAGCAGCACGACTTCTTCAAATCCGCTATGCCGGAAGGCTATGTTCAAGAACGTACCATCTTCTTTAAAGACGATGGCAACTATAAAACCCGTGCAGAAGTTAAATTTGAAGGCGACACGCTGGTAAACCGTATCGAACTGAAAGGCATCGACTTCAAGGAA…		AAGATGGTACGTTCTTGAACATAGCCTTCCGGCATAGCGGATTTGAAGAAGTCGTGCTGCTTCATG	O8
EGFP	ATGGTGTCTAAAGGCGAAGAACTGTTTACTGGCGTAGTACCGATCCTGGTTGAGCTGGACGGTGATGTTAACGGCCACAAATTCTCCGTTTCTGGTGAAGGTGAAGGTGATGCAACCTATGGCAAACTGACCCTGAAATTCATCTGCACTACGGGTAAACTGCCGGTGCCGTGGCCGACTCTGGTCACCACTCTGACCTACGGTGTTCAGTGCTTCTCCCGTTATCCAGATCACATGAAGCAGCACGACTTCTTCAAATCCGCTATGCCGGAAGGCTATGTTCAAGAACGTACCATCTTCTTTAAAGACGATGGCAACTATAAAACCCGTGCAGAAGTTAAATTTGAAGGCGACACGCTGGTAAACCGTATCGAACTGAAAGGCATCGACTTCAAGGAA…	GGAAGGCTATGTTCAAGAACGTACCATCTTCTTTAAAGACGATGGCAACTATAAAACCCGTGCAGA		O9
EGFP	ATGGTGTCTAAAGGCGAAGAACTGTTTACTGGCGTAGTACCGATCCTGGTTGAGCTGGACGGTGATGTTAACGGCCACAAATTCTCCGTTTCTGGTGAAGGTGAAGGTGATGCAACCTATGGCAAACTGACCCTGAAATTCATCTGCACTACGGGTAAACTGCCGGTGCCGTGGCCGACTCTGGTCACCACTCTGACCTACGGTGTTCAGTGCTTCTCCCGTTATCCAGATCACATGAAGCAGCACGACTTCTTCAAATCCGCTATGCCGGAAGGCTATGTTCAAGAACGTACCATCTTCTTTAAAGACGATGGCAACTATAAAACCCGTGCAGAAGTTAAATTTGAAGGCGACACGCTGGTAAACCGTATCGAACTGAAAGGCATCGACTTCAAGGAA…		GATACGGTTTACCAGCGTGTCGCCTTCAAATTTAACTTCTGCACGGGTTTTATAGTTGCCATCGTC	O10
EGFP	ATGGTGTCTAAAGGCGAAGAACTGTTTACTGGCGTAGTACCGATCCTGGTTGAGCTGGACGGTGATGTTAACGGCCACAAATTCTCCGTTTCTGGTGAAGGTGAAGGTGATGCAACCTATGGCAAACTGACCCTGAAATTCATCTGCACTACGGGTAAACTGCCGGTGCCGTGGCCGACTCTGGTCACCACTCTGACCTACGGTGTTCAGTGCTTCTCCCGTTATCCAGATCACATGAAGCAGCACGACTTCTTCAAATCCGCTATGCCGGAAGGCTATGTTCAAGAACGTACCATCTTCTTTAAAGACGATGGCAACTATAAAACCCGTGCAGAAGTTAAATTTGAAGGCGACACGCTGGTAAACCGTATCGAACTGAAAGGCATCGACTTCAAGGAA…	AAGGCGACACGCTGGTAAACCGTATCGAACTGAAAGGCATCGACTTCAAGGAAGACGGCAATATCC		O11
EGFP	ATGGTGTCTAAAGGCGAAGAACTGTTTACTGGCGTAGTACCGATCCTGGTTGAGCTGGACGGTGATGTTAACGGCCACAAATTCTCCGTTTCTGGTGAAGGTGAAGGTGATGCAACCTATGGCAAACTGACCCTGAAATTCATCTGCACTACGGGTAAACTGCCGGTGCCGTGGCCGACTCTGGTCACCACTCTGACCTACGGTGTTCAGTGCTTCTCCCGTTATCCAGATCACATGAAGCAGCACGACTTCTTCAAATCCGCTATGCCGGAAGGCTATGTTCAAGAACGTACCATCTTCTTTAAAGACGATGGCAACTATAAAACCCGTGCAGAAGTTAAATTTGAAGGCGACACGCTGGTAAACCGTATCGAACTGAAAGGCATCGACTTCAAGGAA…		GTTGTGAGAGTTGTAGTTATACTCCAGTTTGTGACCCAGGATATTGCCGTCTTCCTTGAAGTCGAT	O12
EGFP	ATGGTGTCTAAAGGCGAAGAACTGTTTACTGGCGTAGTACCGATCCTGGTTGAGCTGGACGGTGATGTTAACGGCCACAAATTCTCCGTTTCTGGTGAAGGTGAAGGTGATGCAACCTATGGCAAACTGACCCTGAAATTCATCTGCACTACGGGTAAACTGCCGGTGCCGTGGCCGACTCTGGTCACCACTCTGACCTACGGTGTTCAGTGCTTCTCCCGTTATCCAGATCACATGAAGCAGCACGACTTCTTCAAATCCGCTATGCCGGAAGGCTATGTTCAAGAACGTACCATCTTCTTTAAAGACGATGGCAACTATAAAACCCGTGCAGAAGTTAAATTTGAAGGCGACACGCTGGTAAACCGTATCGAACTGAAAGGCATCGACTTCAAGGAA…	CACAAACTGGAGTATAACTACAACTCTCACAACGTTTACATCATGGCGGATAAACAGAAAAACGGC		O13
EGFP	ATGGTGTCTAAAGGCGAAGAACTGTTTACTGGCGTAGTACCGATCCTGGTTGAGCTGGACGGTGATGTTAACGGCCACAAATTCTCCGTTTCTGGTGAAGGTGAAGGTGATGCAACCTATGGCAAACTGACCCTGAAATTCATCTGCACTACGGGTAAACTGCCGGTGCCGTGGCCGACTCTGGTCACCACTCTGACCTACGGTGTTCAGTGCTTCTCCCGTTATCCAGATCACATGAAGCAGCACGACTTCTTCAAATCCGCTATGCCGGAAGGCTATGTTCAAGAACGTACCATCTTCTTTAAAGACGATGGCAACTATAAAACCCGTGCAGAAGTTAAATTTGAAGGCGACACGCTGGTAAACCGTATCGAACTGAAAGGCATCGACTTCAAGGAA…		TTCGATATTATGACGGATCTTGAAATTAACTTTAATGCCGTTTTTCTGTTTATCCGCCATGATGTA	O14
EGFP	ATGGTGTCTAAAGGCGAAGAACTGTTTACTGGCGTAGTACCGATCCTGGTTGAGCTGGACGGTGATGTTAACGGCCACAAATTCTCCGTTTCTGGTGAAGGTGAAGGTGATGCAACCTATGGCAAACTGACCCTGAAATTCATCTGCACTACGGGTAAACTGCCGGTGCCGTGGCCGACTCTGGTCACCACTCTGACCTACGGTGTTCAGTGCTTCTCCCGTTATCCAGATCACATGAAGCAGCACGACTTCTTCAAATCCGCTATGCCGGAAGGCTATGTTCAAGAACGTACCATCTTCTTTAAAGACGATGGCAACTATAAAACCCGTGCAGAAGTTAAATTTGAAGGCGACACGCTGGTAAACCGTATCGAACTGAAAGGCATCGACTTCAAGGAA…	ATTAAAGTTAATTTCAAGATCCGTCATAATATCGAAGATGGTTCTGTACAGCTGGCTGATCACTAC		O15
EGFP	ATGGTGTCTAAAGGCGAAGAACTGTTTACTGGCGTAGTACCGATCCTGGTTGAGCTGGACGGTGATGTTAACGGCCACAAATTCTCCGTTTCTGGTGAAGGTGAAGGTGATGCAACCTATGGCAAACTGACCCTGAAATTCATCTGCACTACGGGTAAACTGCCGGTGCCGTGGCCGACTCTGGTCACCACTCTGACCTACGGTGTTCAGTGCTTCTCCCGTTATCCAGATCACATGAAGCAGCACGACTTCTTCAAATCCGCTATGCCGGAAGGCTATGTTCAAGAACGTACCATCTTCTTTAAAGACGATGGCAACTATAAAACCCGTGCAGAAGTTAAATTTGAAGGCGACACGCTGGTAAACCGTATCGAACTGAAAGGCATCGACTTCAAGGAA…		GCAGTACCGGACCGTCACCAATAGGGGTATTCTGCTGGTAGTGATCAGCCAGCTGTACAGAACCAT	O16
EGFP	ATGGTGTCTAAAGGCGAAGAACTGTTTACTGGCGTAGTACCGATCCTGGTTGAGCTGGACGGTGATGTTAACGGCCACAAATTCTCCGTTTCTGGTGAAGGTGAAGGTGATGCAACCTATGGCAAACTGACCCTGAAATTCATCTGCACTACGGGTAAACTGCCGGTGCCGTGGCCGACTCTGGTCACCACTCTGACCTACGGTGTTCAGTGCTTCTCCCGTTATCCAGATCACATGAAGCAGCACGACTTCTTCAAATCCGCTATGCCGGAAGGCTATGTTCAAGAACGTACCATCTTCTTTAAAGACGATGGCAACTATAAAACCCGTGCAGAAGTTAAATTTGAAGGCGACACGCTGGTAAACCGTATCGAACTGAAAGGCATCGACTTCAAGGAA…	CCTATTGGTGACGGTCCGGTACTGCTGCCAGATAACCACTATCTGTCTACGCAGTCTGCTCTGTCT		O17
EGFP	ATGGTGTCTAAAGGCGAAGAACTGTTTACTGGCGTAGTACCGATCCTGGTTGAGCTGGACGGTGATGTTAACGGCCACAAATTCTCCGTTTCTGGTGAAGGTGAAGGTGATGCAACCTATGGCAAACTGACCCTGAAATTCATCTGCACTACGGGTAAACTGCCGGTGCCGTGGCCGACTCTGGTCACCACTCTGACCTACGGTGTTCAGTGCTTCTCCCGTTATCCAGATCACATGAAGCAGCACGACTTCTTCAAATCCGCTATGCCGGAAGGCTATGTTCAAGAACGTACCATCTTCTTTAAAGACGATGGCAACTATAAAACCCGTGCAGAAGTTAAATTTGAAGGCGACACGCTGGTAAACCGTATCGAACTGAAAGGCATCGACTTCAAGGAA…		AGCAGAACCATGTGATCACGCTTTTCGTTCGGGTCTTTAGACAGAGCAGACTGCGTAGACAGATAG	O18
EGFP	ATGGTGTCTAAAGGCGAAGAACTGTTTACTGGCGTAGTACCGATCCTGGTTGAGCTGGACGGTGATGTTAACGGCCACAAATTCTCCGTTTCTGGTGAAGGTGAAGGTGATGCAACCTATGGCAAACTGACCCTGAAATTCATCTGCACTACGGGTAAACTGCCGGTGCCGTGGCCGACTCTGGTCACCACTCTGACCTACGGTGTTCAGTGCTTCTCCCGTTATCCAGATCACATGAAGCAGCACGACTTCTTCAAATCCGCTATGCCGGAAGGCTATGTTCAAGAACGTACCATCTTCTTTAAAGACGATGGCAACTATAAAACCCGTGCAGAAGTTAAATTTGAAGGCGACACGCTGGTAAACCGTATCGAACTGAAAGGCATCGACTTCAAGGAA…	AACGAAAAGCGTGATCACATGGTTCTGCTGGAGTTTGTAACCGCAGCAGGTATTACCCTGGGTATG		O19
EGFP	ATGGTGTCTAAAGGCGAAGAACTGTTTACTGGCGTAGTACCGATCCTGGTTGAGCTGGACGGTGATGTTAACGGCCACAAATTCTCCGTTTCTGGTGAAGGTGAAGGTGATGCAACCTATGGCAAACTGACCCTGAAATTCATCTGCACTACGGGTAAACTGCCGGTGCCGTGGCCGACTCTGGTCACCACTCTGACCTACGGTGTTCAGTGCTTCTCCCGTTATCCAGATCACATGAAGCAGCACGACTTCTTCAAATCCGCTATGCCGGAAGGCTATGTTCAAGAACGTACCATCTTCTTTAAAGACGATGGCAACTATAAAACCCGTGCAGAAGTTAAATTTGAAGGCGACACGCTGGTAAACCGTATCGAACTGAAAGGCATCGACTTCAAGGAA…		TTTATACAGCTCATCCATACCCAGGGTAATACCTGCTGCGGTTA	O20
FOR primer	AAGGAGATATACCAATGGTGTCTAAAGGCGAAGAACTG			Retrieved from PUREfrex® manual
REV primer	GGATTAGTTATTCATTATTTATACAGCTCATCCATACCCAG			Retrieved from PUREfrex® manual
T7PRO-SD primer	GAAATTAATACGACTCACTATAGGGAGACCACAACGGTTTCCCTCTAGAAATAATTTTGTTTAACTTTAAGAAGGAGATATACCA			Retrieved from PUREfrex® manual
